# Supplementary material for: Identification of EGFR as a Biomarker in Saliva and Buccal Cells from Oral Submucous Fibrosis Patients—A Baseline Study
Source: MDPI journal article supplement (doi:10.3390/diagnostics12081935), 2022-08-11
Supplement: s1 [file s1]

**Table S1.** Expression of EGFR in OSCC samples

| <b>Sample ID</b> | <b>Number</b>  | <b>EGFR</b> | <b>GAPDH</b> | <b>dCt</b> | <b>ddCt</b> | <b>2<sup>-ddCt</sup></b> |
|------------------|----------------|-------------|--------------|------------|-------------|--------------------------|
|                  | Control/Normal | 23.56       | 16.76        | 6.8        |             |                          |
| T1               | 429T           | 22.82       | 18.14        | 4.68       | -0.95       | 1.931872658              |
| T2               | 496T           | 21.97       | 18.15        | 3.82       | -3.07       | 8.397733469              |
| T3               | 438T           | 19.05       | 16.18        | 2.87       | -3.93       | 15.24220797              |
| T4               | 503T           | 19.33       | 14.75        | 4.58       | -4.88       | 29.44600482              |
| T5               | 449T           | 17.93       | 16.05        | 1.88       | -3.17       | 9.000467878              |
| T6               | 650T           | 17.05       | 14.01        | 3.04       | -5.87       | 58.48521281              |
| T7               | 405T           | 17.99       | 13.33        | 4.66       | -4.71       | 26.17286587              |
| T8               | 663T           | 17.05       | 13.87        | 3.18       | -3.09       | 8.51496146               |
| T9               | 518T           | 18.23       | 12.68        | 5.55       | -4.57       | 23.75237713              |
| T10              | 423T           | 21.17       | 14.86        | 6.31       | -2.2        | 4.59479342               |
| T11              | 445T           | 17.26       | 12.67        | 4.59       | -1.44       | 2.713208655              |
| T12              | 270T           | 19.94       | 16.31        | 3.63       | -3.16       | 8.938297105              |
| T13              | 117T           | 26.25       | 17.57        | 8.68       | -4.12       | 17.3877578               |
| T14              | 431T           | 17.1        | 12.28        | 4.82       | 0.93        | 0.524858342              |
| T15              | 245T           | 32.01       | 16.74        | 15.27      | -2.93       | 7.621103984              |
| T16              | 381T           | 20.4        | 16.45        | 3.95       | 7.52        | 0.005448217              |
| T17              | 604T           | 25.34       | 20.06        | 5.28       | -3.8        | 13.92880901              |
| T18              | 440T           | 19.15       | 16.18        | 2.97       | -2.47       | 5.540437872              |
| T19              | 449T           | 20.2        | 13.85        | 6.35       | -4.78       | 27.47409397              |
| T20              | 154T           | 14.79       | 12.77        | 2.02       | -1.4        | 2.639015822              |
| T21              | 217T           | 16.23       | 14.69        | 1.54       | -5.73       | 53.07645093              |
| T22              | 369T           | 16.02       | 13.84        | 2.18       | -6.21       | 74.02804377              |
| T23              | 335T           | 19.09       | 13.47        | 5.62       | -5.57       | 47.50475426              |
| T24              | 367T           | 17.98       | 14.17        | 3.81       | -2.13       | 4.377174805              |
| T25              | 277T           | 16.12       | 13.12        | 3          | -3.94       | 15.34822591              |

**Table S2.** Expression of EGFR in OSMF samples

| Sample ID | Name           | EGFR         | GAPDH        | dCt   | ddCt  | 2 <sup>-ddCt</sup> |
|-----------|----------------|--------------|--------------|-------|-------|--------------------|
|           | Control/Normal | <b>23.56</b> | <b>16.76</b> | 6.8   | -0.95 |                    |
| O1        | Confidential   | 24.86        | 13.46        | 11.4  | 3.65  | 0.079660039        |
| O3        |                | 25.38        | 15.04        | 10.34 | 2.59  | 0.166085727        |
| O4        |                | 25.85        | 18.89        | 6.96  | -0.79 | 1.729074463        |
| O8        |                | 24.54        | 15.09        | 9.45  | 1.7   | 0.307786103        |
| O9        |                | 24.99        | 18.1         | 6.89  | -0.86 | 1.815038311        |
| O10       |                | 29.39        | 21.93        | 7.46  | -0.29 | 1.222640278        |
| O12       |                | 20.65        | 17.09        | 3.56  | -4.19 | 18.25221945        |
| O14       |                | 23.63        | 14.32        | 9.31  | 1.56  | 0.339151082        |
| O15       |                | 16.42        | 12.11        | 4.31  | -3.44 | 10.85283462        |
